# Supplementary material for: Precision mapping of mandibular canal dimensions: cone beam computed tomography insights
Source: PeerJ. 2026 Jan 13;14:e20553. doi: 10.7717/peerj.20553 (PMC12810362; doi:10.7717/peerj.20553)
Supplement: Supplemental Information 1 [file peerj-14-20553-s001.xlsx]

## Sheet: RT male
	buccal cortex thickness										buccal shifting location			mental foramen position				canal diameters related to each tooth						nearest point to lower border
	# 4	# 4/5	# 5	# 5/6	# 6	# 6/7	# 7	# 7/8	# 8					# 4 apex	# 5 apex	lower border		#4	# 5	# 6	# 7	# 8
case 1	N/A	2024-02-02	2024-02-03	2024-03-04	2024-04-05	2024-04-09	2024-06-04	2024-06-08	2024-06-08		apex of distal root of 46			8	2024-08-09	2024-07-05		2024-02-03	2024-03-05	2024-03-01	2024-02-07	2024-02-01		3.4 mesial root of #47
case 2	N/A	2024-02-03	2024-03-04	4	2024-05-05	2024-05-06	2024-05-06	2024-05-09	2024-05-09		apex of mesial root of #47			2024-07-09	2024-06-08	2024-10-03		N/A	2024-03-05	2024-03-07	2024-03-02	2024-03-01		6.5 mesial root of #47
case 3	N/A	1	2024-01-09	2024-02-03	2024-02-09	2024-02-09	2024-03-03	2024-04-05	2024-02-09		apex of distal root # 46			13.1	2024-10-08	2024-07-08		N/A	2024-03-03	2024-04-05	2024-04-01	2024-03-04		4.1 distal surface of root # 47
case 4	2	2024-02-02	3	2024-04-03	2024-05-07	2024-05-07	2024-06-01	2024-05-08	2024-05-05		apex of mesial root of #47			2024-04-08	2024-07-05	2024-08-07		2024-02-02	2024-04-05	2024-04-05	2024-03-08	2024-04-01		2.5 mesial root of #47
case 5	N/A	2024-03-01	2024-03-08	2024-04-07	2024-06-04	8	2024-08-05	8	2024-06-05		apex of mesial root of #47			2024-05-04	2024-06-07	13.1		N/A	2024-03-01	2024-02-09	2024-03-06	2024-03-02		7.8 mesial root of #47
case 6	N/A	2024-02-01	2024-02-07	2024-03-01	2024-03-07	4	2024-06-02	2024-07-04	2024-07-06		apex of mesial root of #47			2024-09-01	2024-06-09	2024-11-04		N/A	2024-02-07	2024-03-03	2024-03-05	2024-03-09		4.1 mesial root of #47
caee 7	N/A	N/A	2024-01-08	2024-02-01	2024-02-04	2024-02-07	2024-03-04	2024-03-09	2024-04-08		apex of mesial root of #47			2024-09-07	2024-09-07	11		N/A	2024-03-02	2024-02-05	2024-03-03	2024-03-01		6.3 mesial root of #47
case 8	N/A	2024-01-07	2	2024-02-04	2024-03-09	2024-04-01	2024-04-06	2024-04-07	2024-04-09		apex of mesial root of #47			2024-06-09	2024-02-05	2024-12-09		N/A	4	2024-02-06	4	2024-03-01		4 mesial root of #47
case 9	N/A	2.7 loop and open at #5	2024-02-05	2024-02-07	2024-03-04	2024-02-05	2024-03-02	2024-03-06	2024-02-09		apex of distal root of #47			2024-08-02	2024-04-01	2024-12-07		N/A	2024-04-05	3	2024-03-02	2024-04-03		3.1 distal surface of root # 47
case 10	N/A	2024-02-01	2024-02-09	4	2024-04-06	2024-06-07	2024-06-07	2024-05-08	2024-04-07		apex of mesial root of #47			2024-07-03	2024-07-01	2024-11-09		N/A	2024-05-03	2024-02-08	2024-03-02	2024-03-04		4.1 distal surface of root # 46
case 11	2024-03-05	2024-03-03	2024-04-03	2024-04-07	2024-04-08	2024-04-09	2024-04-08	2024-03-02	2024-03-02		apex of mesial root of #47			2024-07-04	2024-11-06	2024-10-05		2024-02-09	2024-03-02	2024-02-09	3	2024-02-05		5.1 mesial root of #47
case 12	N/A	2025-01-01	2025-02-04	2025-03-02	2025-03-05	2025-02-05	2025-02-05	2025-03-01	2025-03-05		apex of mesial root of #47			2025-05-02	2025-03-05	2025-05-05			2025-02-01	2025-01-05	2025-03-01	3.0		3.4 mesial root of #47
case 13	N/A	2025-03-02	2025-03-05	2025-01-08	2025-05-02	2025-06-08	2025-07-08	2025-06-02	2025-04-08		apex of distal root # 46			17.8	2025-08-08	15.2			2025-04-05	2025-04-02	2025-04-02	2025-04-05		6.5 mesial root of #47
case 14	N/A	2025-02-07	2025-01-07	2025-04-07	2025-04-01	2025-04-03	2025-04-03	2025-04-05	2025-05-01		apex of mesial root of #47			14.3	2025-06-03	2025-09-03			2025-03-08	2025-02-07	2025-02-07	2025-02-08		4.1 distal surface of root # 47
case 15	N/A	2025-03-08	2025-04-02	2025-02-05	6.0	2025-07-01	2025-08-01	7.0	2025-06-02		apex of mesial root of #47			21.1	2025-11-01	16.1			2025-05-01	2025-03-08	2025-03-08	2025-05-01		2.5 mesial root of #47
case 16	N/A	2025-02-05	2025-02-01	5.0	2025-02-09	2025-03-04	2025-03-04	2025-02-09	2025-02-09		apex of mesial root of #47			2025-08-04	2025-05-04	2025-08-04			2025-02-04	5.0	2025-04-09	2025-01-09		7.8 mesial root of #47
case 17	N/A	2025-02-09	2025-03-01	2025-03-06	2025-04-05	5.0	5.0	2025-05-05	7.0		apex of mesial root of #47			15.0	7.0	11.0			2025-03-09	2025-02-09	2025-03-03	4.0		4.1 mesial root of #47
case 18	N/A	2025-04-01	2025-01-06	2025-02-01	2025-05-08	2025-08-02	2025-08-02	2025-08-01	2025-04-05		apex of mesial root of #47			28.2	2025-11-02	15.2			2025-05-02	2025-04-01	2025-02-05	2025-05-02		6.3 mesial root of #47
case19	N/A	2025-03-03	2025-02-02	2025-04-04	2025-03-01	2025-03-01	2025-03-01	4.0	2025-03-01		apex of distal root of #47			13.1	2025-05-01	2025-08-01			2025-02-08	2025-03-03	2025-03-09	2025-02-01		6.3 mesial root of #47
case 20	N/A	2025-02-05	2025-02-06	2025-01-09	2025-04-09	2025-05-09	2025-05-09	2025-06-05	2025-05-06		apex of mesial root of #47			19.9	2025-08-09	2025-12-09			2025-04-02	2025-02-05	2025-04-06	2025-04-08		3.1 distal surface of root # 47
case 21	N/A	2025-03-09	2025-03-07	2025-03-09	2025-02-03	2025-02-08	2025-02-08	2025-02-04	2025-02-04		apex of mesial root of #47			2025-12-08	2025-05-08	2025-07-08			2025-02-03	2025-03-09	2025-01-08	2025-02-07		4.1 distal surface of root # 46
case 22	N/A	2025-04-06	2025-01-05	2025-02-04	2025-05-05	2025-06-01	2025-06-01	2025-05-08	2025-06-07		apex of mesial root of #47			16.1	2025-09-01	13.1			2025-04-09	2025-04-06	2025-03-06	2025-04-06		5.1 mesial root of #47
case 23	N/A	2025-01-08	2025-02-08	2025-04-08	2025-03-08	4.0	4.0	2025-03-03	4.0		apex of mesial root of #47			14.0	6.0	9.0			3.0	2025-01-08	4.0	2025-02-03		6.5 mesial root of #47
case 24	N/A	2025-03-06	2025-03-06	2025-03-01	2025-04-07	2025-07-05	2025-07-05	2025-07-03	2025-05-08		apex of mesial root of #47			27.5	2025-10-05	15.5			2025-05-05	2025-03-06	2025-02-02	5.0		4.1 distal surface of root # 47
case 25	N/A	4.0	2025-04-01	2025-02-02	2025-02-06	2025-03-02	2025-03-02	2025-02-08	2025-03-09		apex of mesial root of #47			13.2	2025-05-02	2025-08-02			2025-02-06	4.0	2025-04-05	2025-03-01		2.5 mesial root of #47
case 26	N/A	2025-02-02	2.0	2025-04-01	2025-06-02	2025-05-05	2025-05-05	5.0	2025-05-02		apex of mesial root of #47			15.5	2025-08-05	2025-11-05			2025-03-01	2025-02-02	2025-03-01	2025-04-02		7.8 mesial root of #47
case 27	N/A	2025-03-05	2025-03-03	2025-01-06	3.0	2025-02-07	2025-02-07	2025-04-01	2025-06-01		apex of distal root of #47			2025-12-07	2025-05-07	2025-07-07			2025-04-07	2025-04-05	2025-05-02	2025-02-05		4.1 mesial root of #47
case 28	N/A	2025-01-07	2025-01-04	2025-03-05	2025-05-01	2025-06-05	2025-06-05	2025-06-07	2025-04-07		apex of mesial root of #47			16.5	2025-09-05	13.5			2025-02-09	2025-03-01	2025-02-04	2025-03-09		6.3 mesial root of #47
case 29	N/A	2025-03-01	2025-02-03	2025-02-09	4.0	2025-04-06	2025-04-06	2025-03-05	2025-03-08		apex of mesial root of #47			14.6	2025-06-06	2025-10-06			2025-04-01	2025-05-02	2025-04-07	2025-04-07		6.3 mesial root of #47
case 30	N/A	2025-02-09	3.0	2025-04-03	2025-02-05	2025-07-08	2025-07-08	2025-07-05	2025-05-04		apex of mesial root of #47			27.8	2025-11-08	17.8			5.0	2025-02-04	2025-03-05	2025-03-06		3.1 distal surface of root # 47
case 31	N/A	2025-04-05	4.0	2025-03-08	2025-05-06	2025-03-09	2025-03-09	2025-04-09	2025-02-08		apex of distal root # 46			13.9	2025-05-09	2025-08-09			2025-03-06	2025-04-07	2025-02-06	2025-02-02		4.1 distal surface of root # 46
case 32	N/A	2.0	2025-01-09	2025-02-06	2025-03-03	2025-05-03	2025-05-03	2025-05-09	6.0		apex of mesial root of #47			15.3	2025-08-03	2025-11-03			2025-02-05	2025-03-05	2025-04-03	2025-04-03		5 mesial root of #47
case 33	N/A	2025-03-03	2025-02-05	2025-01-05	2025-04-04	2025-02-04	2025-02-04	2025-02-06	2025-04-09		apex of mesial root of #47			2025-12-04	2025-05-04	2025-07-04			2025-04-03	2025-02-06	3.0	2025-03-02		3.4 mesial root of #47
case 34	N/A	2025-02-04	2025-03-02	2025-04-05	2025-02-08	6.0	6.0	2025-06-08	2025-03-07		apex of mesial root of #47			16.0	9.0	13.0			2025-03-07	2025-04-03	2025-04-09	2025-05-01		6.5 mesial root of #47
case 35	N/A	2025-03-07	2025-02-09	2025-02-03	2025-06-01	2025-04-04	2025-04-04	2025-03-09	2025-05-05		apex of mesial root of #47			14.4	2025-06-04	2025-09-04			2025-05-04	3.0	2.0	2025-02-08		4.9 distal surface of root # 47
case 36	N/A	2025-01-05	2025-03-09	2025-03-03	2025-03-06	2025-07-02	2025-07-02	2025-05-02	2025-02-03		apex of mesial root of #47			27.2	2025-10-02	16.2			2025-02-02	2025-04-09	2025-04-04	2025-04-04		2.5 mesial root of #47
case 37	N/A	2025-04-02	2025-01-03	2025-04-09	2025-05-09	2025-03-06	2025-03-06	2025-04-04	2025-06-03		apex of distal root of #47			13.6	2025-05-06	2025-08-06			2025-04-06	2.0	2025-03-02	3.0		6.5 mesial root of #47
case 38	N/A	2025-02-08	2025-02-07	2025-01-07	2025-04-02	2025-05-01	2025-05-01	2025-07-01	2025-04-01		apex of distal root of #47			15.1	2025-08-01	2025-12-01			2025-03-09	2025-04-04	2025-05-01	2025-05-03		4.1 distal surface of root # 47
case 39	N/A	2025-03-04	2025-03-08	2025-03-07	2025-02-02	2025-02-09	2025-02-09	3.0	2025-05-09		apex of mesial root of #47			2025-12-09	2025-05-09	2025-07-09			2025-05-01	2025-03-02	2025-02-08	2025-02-06		2.5 mesial root of #47
case 40	N/A	2025-01-09	2025-04-03	2025-02-08	2025-05-04	2025-06-06	2025-06-06	2025-06-01	2025-03-06		apex of mesial root of #47			16.6	2025-09-06	13.6			2025-02-08	2025-05-01	2025-03-07	2025-04-09		7.8 mesial root of #47
case 41	N/A	2025-04-03	2025-02-04	2025-04-06	2025-03-02	2025-04-02	2025-04-02	2025-03-08	2025-04-02		apex of mesial root of #47			14.2	2025-06-02	2025-09-02			2025-04-04	2025-02-08	2025-04-08	2025-03-04		4.1 mesial root of #47
case 42	N/A	2025-02-06	2025-01-08	2.0	2025-04-08	2025-07-04	2025-07-04	2025-05-04	2025-06-04		apex of distal root # 46			27.4	2025-10-04	15.4			3.0	2025-03-07	2025-02-03	2025-03-07		6.3 mesial root of #47
case 43	N/A	3.0	2025-02-02	3.0	2025-02-07	2025-03-07	2025-03-07	2025-02-07	2025-02-07		apex of mesial root of #47			13.7	2025-05-07	2025-08-07			2025-05-02	2025-04-08	4.0	2025-04-01		6.3 mesial root of #47
case 44	N/A	2025-04-04	2025-03-05	2025-04-02	2025-06-03	2025-05-02	2025-05-02	2025-07-02	5.0		apex of mesial root of #47			15.2	2025-08-02	2025-11-02			2025-02-07	2025-02-03	2025-03-04	2025-02-04		3.1 distal surface of root # 47
case 45	N/A	2025-02-03	2025-02-09	2025-02-07	2025-03-09	2025-02-06	2025-02-06	2025-04-06	2025-04-03		apex of mesial root of #47			2025-12-06	2025-05-06	2025-07-06			4.0	4.0	2025-02-01	2025-04-05		4.1 distal surface of root # 46
case 46	N/A	2025-03-08	2025-04-01	2025-03-04	2025-05-03	2025-06-03	2025-06-03	2025-06-04	2025-05-07		apex of mesial root of #47			16.3	2025-09-03	13.3			2025-03-05	2025-03-04	2025-04-02	2025-03-03		5.1 mesial root of #47
case 47	N/A	2025-01-06	2025-01-05	2025-01-03	2025-04-03	2025-04-05	2025-04-05	2025-03-02	3.0		apex of mesial root of #47			14.5	2025-06-05	2025-09-05			2025-04-08	2025-02-01	2025-03-03	5.0		7.5 mesial root of #47
case 48	N/A	2025-03-05	2025-02-06	2025-05-02	2.0	7.0	7.0	2025-05-06	2025-06-06		apex of distal root of #47			27.0	10.0	16.0			2025-02-04	2025-04-02	2025-04-09	2025-02-09		4.1 distal surface of root # 47
case 49	N/A	2025-02-01	2025-03-04	2025-02-05	5.0	2025-03-03	2025-03-03	2025-04-02	2025-02-05		apex of mesial root of #47			13.3	2025-05-03	2025-08-03			2025-04-06	2025-03-03	2025-02-05	2025-04-08		6.3 mesial root of #47
case 50	N/A	4.0	2025-02-01	2025-03-01	2025-03-04	2025-05-04	2025-05-04	2025-06-03	2025-05-03		apex of mesial root of #47			15.4	2025-08-04	2025-12-04			2025-03-01	2025-04-09	2025-03-08	2.0		6.3 mesial root of #47
case 51	N/A	2025-02-05	2025-01-07	4.0	2025-04-06	2025-02-02	2025-02-02	2025-03-04	2025-04-04		apex of mesial root of #47			2025-12-02	2025-05-02	2025-07-02			2025-05-03	2025-02-05	2025-04-05	2025-04-02		3.1 distal surface of root # 47
case 52	N/A	2025-03-09	3.0	2025-01-08	2025-02-09	2025-06-09	2025-06-09	2025-07-04	2025-03-02		apex of mesial root of #47			16.9	2025-09-09	14.9			2025-02-05	2025-03-08	2025-02-09	2025-03-05		4.1 distal surface of root # 46
case 53	N/A	2025-01-08	2025-02-05	2025-02-06	2025-05-07	2025-04-08	2025-04-08	2025-04-08	2025-06-09		apex of mesial root of #47			14.8	2025-06-08	2025-09-08			2025-04-09	2025-04-05	2025-03-01	2025-05-02		5.1 mesial root of #47
case 54	N/A	2025-03-06	2025-03-02	2025-03-05	2025-03-07	2025-07-07	2025-07-07	2025-06-09	2025-02-06		apex of mesial root of #47			27.7	2025-10-07	16.7			2025-03-06	2025-02-09	5.0	2025-02-05		3.4 mesial root of #47
case 55	N/A	2025-04-01	2025-01-09	2025-04-09	2025-04-01	2025-03-05	2025-03-05	2025-03-07	2025-05-01		apex of mesial root of #47			13.5	2025-05-05	2025-08-05			5.0	2025-03-01	2025-02-07	2025-03-09		6.4 mesial root of #47
case 56	N/A	2025-02-02	4.0	2025-02-01	2025-02-04	2025-05-06	2025-05-06	2025-05-01	2025-03-05		apex of distal root of #47			15.6	2025-08-06	2025-11-06			2025-02-02	5.0	2025-04-01	2025-04-07		5.1 distal surface of root # 47
case 57	N/A	2025-03-01	2025-02-08	2025-01-07	6.0	2025-02-03	2025-02-03	2025-02-05	2025-06-02		apex of mesial root of #47			2025-12-03	2025-05-03	2025-07-03			2025-04-02	2025-02-07	2025-03-06	2025-03-01		2.5 mesial root of #47
case 58	N/A	2025-02-07	2025-01-06	2025-03-02	2025-03-05	2025-06-02	2025-06-02	2025-05-07	2025-04-08		apex of mesial root of #47			16.2	2025-09-02	13.2			2025-03-07	2025-04-01	2025-02-02	2025-04-06		6.5 mesial root of #47
case 59	N/A	2025-04-05	2025-02-03	2025-02-09	2025-05-02	2025-04-07	2025-04-07	2025-04-03	2025-03-09		apex of mesial root of #47			14.7	2025-06-07	2025-09-07			2025-05-01	2025-03-06	2025-04-04	2025-02-08		4.1 distal surface of root # 47
case 60	N/A	2025-01-09	2025-03-03	2025-04-05	4.0	2025-07-06	2025-07-06	6.0	2025-05-04		apex of distal root # 46			27.6	2025-10-06	16.6			2025-02-09	2025-02-02	3.0	2025-05-01		2.5 mesial root of #47
case 61	N/A	2025-03-03	2.0	2025-01-06	2025-02-08	3.0	3.0	2025-03-06	2025-02-09		apex of mesial root of #47			13.0	5.0	8.0			2025-04-03	2025-04-04	2025-03-07	3.0		2.3 mesial root of #47
case 62	N/A	2025-02-04	2025-01-04	2025-02-03	2025-04-05	2025-05-08	6	2025-05-03	6.0		apex of mesial root of #47			15.8	2025-08-08	2025-11-08			2025-03-08	3.0	2025-04-01	2025-04-04		6.5 mesial root of #47
case 63	N/A	2025-01-08	2025-03-16	4	2025-04-21	2025-04-01	4	2025-05-02	2025-03-04		apex of mesial root of #47			14.1	6.0	2025-09-05			2025-03-02	2025-03-02	2025-02-04	2025-03-08		4.1 distal surface of root # 47

## Sheet: Rt female
	buccal cortex thickness										buccal shifting location			mental foramen position				canal diameters related to each tooth						nearest point to lower border
	# 4	# 4/5	# 5	# 5/6	# 6	# 6/7	# 7	# 7/8	# 8					# 4 apex	# 5 apex	lower border		#4	# 5	# 6	# 7	# 8
case 1	N/A	2024-02-02	2024-02-09	2024-03-09	2024-05-02	2024-06-01	2024-06-05	6	2024-05-07		apex of distal root of # 46			2024-08-06	2024-07-06	2024-07-09		N/A	2024-02-06	2024-02-06	2024-02-04	2024-02-06		3.2 mm apex mesial root of # 48
case 2	N/A	2024-02-04	2024-03-01	2024-04-02	2024-05-04	2024-06-08	2024-05-05	2024-05-01	4		apex of distal root of # 46			2024-04-02	2024-05-07	2024-10-03		N/A	2024-02-03	2024-03-01	2024-02-01	2024-02-03		5.7 mm apex of mesial root of # 47
case 3	2024-01-05	2	2024-02-03	2024-03-02	2024-04-07	2024-05-03	2024-05-06	2024-05-02	4		apex of distal root of # 46			2024-06-06	2024-10-04	2024-07-08		2024-02-09	2024-03-05	4	2024-03-05	3		3.9 mm apex mesial root of # 48
case 4	N/A	2024-02-06	2024-03-01	2024-03-06	2024-04-03	2024-04-03	2024-05-04	2024-04-08	2024-05-03		apex of distal root of # 46			2024-09-08	2024-09-03	2024-09-04		N/A	4	2024-03-02	2024-03-08	2024-03-08		5.1 mm apex of mesial root of # 47
case 5	2024-01-08	2024-01-03	2024-01-07	2024-01-09	2024-03-09	2024-04-07	2024-05-03	2024-05-03	2024-04-06		apex of distal root of # 47			2024-06-09	2024-07-06	2024-11-04		2024-01-04	2024-02-01	2024-02-05	2024-03-08	2024-03-03		6.5 mm apex of mesial root of # 47
case 6	2024-02-04	2024-03-04	2024-03-09	4	2024-04-08	5	6	2024-05-03	4		apex of distal root of # 47			2024-06-04	2024-06-07	2024-11-07		2024-02-06	2024-04-02	2024-03-06	2024-02-09	2024-02-06		4.9 mm apex mesial root of # 48
case 7	N/A	N/A	2024-01-08	2024-02-04	3	2024-03-05	2024-05-01	2024-04-02	2024-04-07		apex of distal root of # 46			2024-09-02	2024-03-01	10		N/A	2024-03-07	2024-03-01	2024-02-06	2024-02-08		5.4 mm apex of mesial root of # 47
case 8	N/A	2024-03-02	2024-03-09	2024-04-06	2024-05-04	2024-05-03	2024-05-05	2024-05-03	2024-05-03		apex of mesial root of # 46			2024-08-06	2024-07-05	2024-08-09		N/A	2024-08-03	2024-07-04	2024-02-09	2024-03-03		4.7 mm apex of mesial root of # 47
case 9	N/A	N/A	2024-02-03	2024-03-08	2024-04-04	6	2024-05-09	2024-05-07	2024-03-07		apex of distal root of # 46			- 3.3	- 4.7	13.3		N/A	2024-03-07	2024-02-05	2024-02-03	2024-02-01		5.4 mm apex of distal root of # 46
case 10	2024-05-03	2024-06-09	2024-07-01	8	2024-08-05	2024-09-02	2024-09-07	2024-09-01	2024-06-06		apex of distal root of # 46			2024-02-08	2024-07-01	2024-12-03		2024-02-09	2024-03-04	3	2024-03-04	3		5.9 mm apex of mesial root of # 47
case 11	N/A	2025-01-01	2025-01-01	2025-02-01	2025-02-01	2025-02-01	2025-03-01	2025-02-01	2025-02-05		apex of distal root of # 46			2025-05-01	2025-04-01	2025-05-01		N/A	2025-01-01	2025-01-05	2025-01-01	2025-01-01		3.2 mm apex mesial root of # 48
case 12	N/A	2025-04-02	2025-03-02	2025-04-02	2025-05-02	2025-07-02	2025-07-02	2025-07-02	5.0		apex of distal root of # 46			2025-08-02	2025-08-02	2025-12-02		N/A	2025-04-02	2025-04-02	2025-04-02	2025-04-02		5.7 mm apex of mesial root of # 47
case 13	2024-01-05	2025-02-07	2025-02-07	2025-03-07	2025-04-07	2025-05-07	2025-05-07	2025-05-07	2025-03-08		apex of distal root of # 46			2025-06-07	2025-06-07	2025-09-07		2024-02-09	2025-03-07	2025-02-07	2025-02-07	2025-02-07		3.9 mm apex mesial root of # 48
case 14	N/A	2025-03-08	2025-04-01	2025-04-08	2025-05-08	2025-06-08	2025-08-08	2025-06-08	2025-06-01		apex of distal root of # 46			2025-09-08	2025-10-08	13.8		N/A	2025-04-08	2025-03-08	2025-03-08	2025-03-08		5.1 mm apex of mesial root of # 47
case 15	2024-01-08	5.0	2025-02-05	2025-01-09	2025-03-09	2025-03-09	2025-04-09	2025-03-09	2025-03-04		apex of distal root of # 47			2025-04-09	2025-05-09	2025-08-09		2024-01-04	2025-01-09	5.0	5.0	5.0		6.5 mm apex of mesial root of # 47
case 16	2024-02-04	2025-02-09	2025-03-09	2025-03-05	2025-04-05	2025-05-05	2025-06-05	2025-05-05	2025-04-09		apex of distal root of # 47			2025-07-05	2025-07-05	2025-10-05		2024-02-06	2025-03-05	2025-02-09	2025-02-09	2025-02-09		5.1 mm apex mesial root of # 48
case 17	N/A	2025-04-01	2025-01-08	4.0	6.0	2025-07-01	2025-08-01	2025-07-01	2025-06-02		apex of distal root of # 46			2025-09-01	2025-09-01	2025-12-01		N/A	4.0	2025-04-01	2025-04-01	2025-04-01		5.4 mm apex of mesial root of # 47
case 18	N/A	2025-03-03	2025-03-06	2025-02-05	2025-03-05	2025-04-03	2025-04-03	2025-04-03	2025-03-01		apex of mesial root of # 46			2025-05-03	2025-05-03	2025-08-03		N/A	2025-02-05	2025-03-03	2025-03-03	2025-03-03		4.7 mm apex of mesial root of # 47
case19	N/A	2025-02-05	4.0	2025-05-01	2025-05-01	2025-06-09	2025-07-09	2025-06-09	2025-05-09		apex of distal root of # 46			2025-08-09	2025-08-09	2025-11-09		N/A	2025-05-01	2025-02-05	2025-02-05	2025-02-05		5.4 mm apex of distal root of # 46
case 20	N/A	2025-03-09	2025-02-02	2025-02-08	2025-02-08	2025-03-08	2025-03-08	2025-03-08	2025-02-08		apex of distal root of # 46			2025-04-08	2025-04-08	2025-07-08		2024-02-09	2025-02-08	2025-03-09	2025-03-09	2025-03-09		6mm apex of mesial root of # 47
case 21	N/A	2025-04-06	2025-03-05	2025-04-06	2025-04-06	2025-07-06	2025-08-06	2025-07-06	2025-06-01		apex of distal root of # 46			2025-09-06	2025-09-06	2025-11-06		N/A	2025-04-06	2025-04-06	2025-04-06	2025-04-06		3.2 mm apex mesial root of # 48
case 22	N/A	2025-01-08	2025-01-07	2025-03-01	2025-03-01	2025-02-08	2025-03-09	2025-02-08	4.0		apex of distal root of # 46			2025-04-09	2025-04-09	2025-09-09		N/A	2025-03-01	2025-01-08	2025-01-08	2025-01-08		6 mm apex of mesial root of # 47
case 23	2024-01-05	2025-03-06	2025-03-01	2025-05-02	2025-05-02	2025-06-06	2025-07-06	2025-06-06	2025-05-05		apex of distal root of # 46			2025-08-06	2025-08-06	13.6		2024-02-09	2025-05-02	2025-03-06	2025-03-06	2025-03-06		3.9 mm apex mesial root of # 48
case 24	N/A	4.0	2025-02-09	2025-03-06	2025-03-06	7.0	6.0	7.0	2025-02-07		apex of distal root of # 46			7.0	7.0	2025-08-02		N/A	2025-03-06	4.0	4.0	4.0		5.1 mm apex of mesial root of # 47
case 25	2024-01-08	2025-02-02	2025-04-05	2025-04-09	2025-04-09	2025-04-02	2025-04-02	2025-04-02	2025-06-05		apex of distal root of # 47			2025-05-02	2025-05-02	2025-12-05		2024-01-04	2025-04-09	2025-02-02	2025-02-02	2025-02-02		6.5 mm apex of mesial root of # 47
case 26	2024-02-04	2025-04-05	2.0	2025-02-02	2025-02-02	2025-08-05	2025-09-05	2025-08-05	2025-04-06		apex of distal root of # 47			2025-10-05	2025-10-05	2025-07-07		2025-02-03	2025-02-02	2025-04-05	2025-04-05	2025-04-05		5.1 mm apex mesial root of # 48
case 27	N/A	2025-03-01	2025-03-03	5.0	5.0	2025-03-01	2025-03-01	2025-03-01	2025-05-08		apex of distal root of # 46			2025-04-01	2025-04-01	13.5		N/A	5.0	2025-03-01	2025-03-01	2025-03-01		5.4 mm apex of mesial root of # 47
case 28	N/A	2025-05-02	2025-02-04	2025-02-09	2025-02-09	2025-07-02	2025-07-02	2025-07-02	2025-03-09		apex of mesial root of # 46			2025-08-02	2025-08-02	2025-10-06		N/A	2025-02-09	2025-05-02	2025-05-02	2025-05-02		4.7 mm apex of mesial root of # 47
case 29	N/A	2025-02-04	2025-03-07	2025-04-03	2025-04-03	2025-05-05	2025-05-05	2025-05-05	2025-05-03		apex of distal root of # 46			2025-06-05	2025-06-05	14.8		N/A	2025-04-03	2025-02-04	2025-02-04	2025-02-04		5.4 mm apex of distal root of # 46
case 30	N/A	2025-04-07	2025-01-05	3.0	3.0	2025-04-06	2025-04-06	2025-04-06	2025-02-04		apex of distal root of # 46			2025-05-06	2025-05-06	2025-08-09		2025-02-05	3.0	2025-04-07	2025-04-07	2025-04-07		5.9 mm apex of mesial root of # 47
case 31	N/A	2025-03-05	2025-04-02	2025-05-03	2025-05-03	2025-08-03	2025-08-03	2025-08-03	6.0		apex of distal root of # 46			2025-09-03	2025-09-03	2025-11-03		N/A	2025-05-03	2025-03-05	2025-03-05	2025-03-05		6.5 mm apex of mesial root of # 47
case 32	N/A	2025-02-06	2025-02-08	2025-02-06	2025-02-06	5.0	5.0	5.0	2025-04-04		apex of distal root of # 46			6.0	6.0	2025-07-04		N/A	2025-02-06	2025-02-06	2025-02-06	2025-02-06		5.1 mm apex mesial root of # 48
case 33	2	2025-04-03	2025-03-04	2025-04-07	2025-04-07	2025-06-09	2025-06-09	2025-06-09	2025-05-02		apex of distal root of # 46			2025-07-09	2025-07-09	13.0		2024-02-09	2025-04-07	2025-04-03	2025-04-03	2025-04-03		5.4 mm apex of mesial root of # 47
case 34	N/A	3.0	2025-01-09	2025-03-09	2025-03-09	2025-03-07	2025-03-07	2025-03-07	2025-03-06		apex of distal root of # 46			2025-04-07	2025-04-07	2025-09-04		N/A	2025-03-09	3.0	3.0	3.0		4.7 mm apex of mesial root of # 47
case 35	2024-01-08	2025-04-09	2025-04-03	2025-05-04	2025-05-04	2025-05-08	2025-05-08	2025-05-08	2025-05-01		apex of distal root of # 47			2025-06-08	2025-06-08	2025-12-02		2024-01-04	2025-05-04	2025-04-09	2025-04-09	2025-04-09		4.5mm apex of distal root of # 46
case 36	2024-02-04	2.0	2025-02-06	2025-02-04	2025-02-04	2025-04-09	2025-04-09	2025-04-09	2025-02-09		apex of distal root of # 47			2025-05-09	2025-05-09	2025-08-06		2025-01-09	2025-02-04	2.0	2.0	2.0		5 mm apex of mesial root of # 47
case 37	N/A	2025-04-04	3.0	2025-04-05	2025-04-05	2025-07-04	2025-07-04	2025-07-04	2025-06-06		apex of distal root of # 46			2025-08-04	2025-08-04	2025-11-01		N/A	2025-04-05	2025-04-04	2025-04-04	2025-04-04		3.2 mm apex mesial root of # 48
case 38	N/A	2025-03-02	2025-04-04	2025-03-03	2025-03-03	2025-02-09	2025-02-09	2025-02-09	2025-04-02		apex of mesial root of # 46			2025-03-09	2025-03-09	2025-07-09		N/A	2025-03-03	2025-03-02	2025-03-02	2025-03-02		5.7 mm apex of mesial root of # 47
case 39	N/A	2025-05-01	2025-02-03	2025-05-05	2025-05-05	8.0	8.0	8.0	2025-05-04		apex of distal root of # 46			9.0	9.0	13.6		N/A	2025-05-05	2025-05-01	2025-05-01	2025-05-01		3.9 mm apex mesial root of # 48
case 40	N/A	2025-02-08	2025-03-08	2025-02-07	2025-02-07	2025-04-04	2025-04-04	2025-04-04	2025-03-07		apex of distal root of # 46			2025-05-04	2025-05-04	2025-09-02		2025-01-08	2025-02-07	2025-02-08	2025-02-08	2025-02-08		5.1 mm apex of mesial root of # 47
case 41	N/A	N/A	2	2025-04-01	2025-04-01	2025-06-07	2025-06-07	2025-06-07	2025-05-02		apex of distal root of # 46			2025-07-07	2025-07-07	2025-12-04		N/A	2025-04-01	2025-03-07	2025-03-07	2025-03-07		3.2 mm apex mesial root of # 48
case 42	N/A	N/A	3	2025-03-08	2025-03-08	2025-05-02	2025-05-02	2025-05-02	2025-02-06		apex of distal root of # 46			2025-06-02	2025-06-02	2025-08-07		N/A	2025-03-08	2025-04-08	2025-04-08	2025-04-08		5.7 mm apex of mesial root of # 47
case 43	2024-01-05	2025-02-03	2025-02-01	2025-05-06	2025-05-06	2025-07-01	2025-07-01	2025-07-01	2025-06-03		apex of distal root of # 46			2025-08-01	2025-08-01	2025-11-02		2024-02-09	2025-05-06	2025-02-03	2025-02-03	2025-02-03		3.9 mm apex mesial root of # 48
case 44	N/A	N/A	2025-01-08	2025-02-03	2025-02-03	2025-03-06	2025-03-06	2025-03-06	2025-04-05		apex of distal root of # 46			2025-04-06	2025-04-06	2025-07-06		N/A	2025-02-03	4.0	4.0	4.0		5.1 mm apex of mesial root of # 47
case 45	2024-01-08	2025-03-04	2025-02-05	4.0	4.0	2025-08-09	2025-08-09	2025-08-09	5.0		apex of distal root of # 47			2025-09-09	2025-09-09	13.3		2025-02-03	4.0	2025-03-04	2025-03-04	2025-03-04		6.5 mm apex of mesial root of # 47
case 46	2024-02-04	2025-02-01	2025-03-09	2025-03-04	2025-03-04	2025-04-01	2025-04-01	2025-04-01	2025-03-03		apex of distal root of # 47			2025-05-01	2025-05-01	2025-09-05		2024-02-06	2025-03-04	2025-02-01	2025-02-01	2025-02-01		5.1 mm apex mesial root of # 48
case 47	N/A	N/A	2025-01-08	2025-05-07	2025-05-07	2025-06-05	2025-06-05	2025-06-05	2025-05-04		apex of distal root of # 46			2025-07-05	2025-07-05	12.0		N/A	2025-05-07	2025-04-02	2025-04-02	2025-04-02		5.4 mm apex of mesial root of # 47
case 48	N/A	2025-03-03	2025-03-06	2.0	2.0	2025-05-06	2025-05-06	2025-05-06	2025-02-02		apex of mesial root of # 46			2025-06-06	2025-06-06	2025-08-03		N/A	2.0	2025-03-03	2025-03-03	2025-03-03		4.7 mm apex of mesial root of # 47
case 49	N/A	N/A	2025-04-01	2025-04-02	2025-04-02	2025-07-03	2025-07-03	2025-07-03	2025-06-09		apex of distal root of # 46			2025-08-03	2025-08-03	2025-12-04		N/A	2025-04-02	2025-04-09	2025-04-09	2025-04-09		5.4 mm apex of distal root of # 46
case 50	2025-01-05	2025-02-05	2025-02-02	2025-03-05	2025-03-05	2025-02-05	2025-02-05	2025-02-05	2025-04-08		apex of distal root of # 46			2025-04-05	2025-04-05	2025-07-02		2	2025-03-05	2025-02-05	2025-02-05	2025-02-05		5.9 mm apex of mesial root of # 47
case 51	N/A	N/A	2025-03-01	2025-05-01	2025-05-01	2025-08-02	2025-08-02	2025-08-02	2025-05-07		apex of distal root of # 46			2025-09-02	2025-09-02	14.9		N/A	2025-05-01	2025-03-08	2025-03-08	2025-03-08		6.5 mm apex of mesial root of # 47
case 52	N/A	N/A	2025-02-07	2025-02-09	2025-02-09	4.0	4.0	4.0	2025-03-05		apex of distal root of # 46			5.0	5.0	2025-09-08		N/A	2025-02-09	2025-04-05	2025-04-05	2025-04-05		5.1 mm apex mesial root of # 48
case 53	2024-01-05	2025-02-09	2025-04-05	2025-04-08	2025-04-08	2025-06-01	2025-06-01	2025-06-01	2025-05-06		apex of distal root of # 46			2025-07-01	2025-07-01	13.7		2024-02-09	2025-04-08	2025-02-09	2025-02-09	2025-02-09		6 mm apex of mesial root of # 47
case 54	N/A	N/A	2025-01-09	2025-02-01	2025-02-01	2025-03-02	2025-03-02	2025-03-02	2025-02-03		apex of distal root of # 46			2025-04-02	2025-04-02	2025-08-05		N/A	2025-02-01	2025-03-01	2025-03-01	2025-03-01		4.6 mm apex of mesial root of # 47
case 55	N/A	N/A	2025-03-03	5.0	5.0	2025-07-05	2025-07-05	2025-07-05	2025-06-02		apex of distal root of # 47			2025-08-05	2025-08-05	2025-11-06		2025-02-05	5.0	5.0	5.0	5.0		5.4 mm apex of distal root of # 46
case 56	2024-02-04	2025-02-07	2025-02-04	2025-03-02	2025-03-02	2025-05-09	2025-05-09	2025-05-09	2025-04-07		apex of distal root of # 47			2025-06-09	2025-06-09	2025-07-03		2025-01-06	2025-03-02	2025-02-07	2025-02-07	2025-02-07		6 mm apex of mesial root of # 47
case 57	N/A	2025-04-01	2025-03-07	2025-04-09	2025-04-09	2025-08-01	2025-08-01	2025-08-01	2025-05-06		apex of distal root of # 46			2025-09-01	2025-09-01	13.2		N/A	2025-04-09	2025-04-01	2025-04-01	2025-04-01		3.2 mm apex mesial root of # 48
case 58	N/A	2025-03-06	2025-01-05	2025-02-05	2025-02-05	2025-03-03	2025-03-03	2025-03-03	3.0		apex of mesial root of # 46			2025-04-03	2025-04-03	2025-09-07		N/A	2025-02-05	2025-03-06	2025-03-06	2025-03-06		5.7 mm apex of mesial root of # 47
case 59	N/A	2025-02-02	2025-04-02	2025-04-06	2025-04-06	2025-06-04	2025-06-04	2025-06-04	2025-05-08		apex of distal root of # 46			2025-07-04	2025-07-04	2025-12-06		N/A	2025-04-06	2025-02-02	2025-02-02	2025-02-02		3.9 mm apex mesial root of # 48
case 60	N/A	N/A	2025-02-08	2025-03-01	2025-03-01	2025-05-01	2025-05-01	2025-05-01	2025-02-01		apex of distal root of # 46			2025-06-01	2025-06-01	8.0		2025-02-05	2025-03-01	2025-04-04	2025-04-04	2025-04-04		5.9 mm apex of mesial root of # 47
case 61	N/A	3.0	2025-03-04	2025-05-02	2025-05-02	7.0	7.0	7.0	2025-06-05		apex of mesial root of # 46			8.0	8.0	2025-11-08		N/A	2025-05-02	3.0	3.0	3.0		3.2 mm apex mesial root of # 48
case 62	N/A	2025-03-07	2025-01-06	3.0	3.0	2025-04-05	2025-04-05	2025-04-05	2025-04-01		apex of distal root of # 46			2025-05-05	2025-05-05	2025-07-05		N/A	3.0	2025-03-07	2025-03-07	2025-03-07		5.7 mm apex of mesial root of # 47
case 63	2024-01-05	2025-02-08	2.83	4.48	2.98	3.36	2025-06-15	2025-05-08	4.42		apex of distal root of # 46			6.92	2025-07-01	2025-11-03		3	5.84	3.75	1.48	2.64		3.1 mm apex mesial root of # 48

## Sheet: female left
	buccal cortex thickness										buccal shifting location			mental foramen position				canal diameters related to each tooth						nearest point to lower border
	# 4	# 4/5	# 5	# 5/6	# 6	# 6/7	# 7	# 7/8	# 8					# 4 apex	# 5 apex	lower border		#4	# 5	# 6	# 7	# 8
case 1	N/A	2024-02-09	2024-03-03	2024-03-05	2024-05-07	2024-04-06	2024-04-04	2024-05-02	3		apex of distal root of # 36			2024-08-03	2024-06-03	2024-07-09		N/A	2024-02-06	2024-02-09	3	3		3.4 mm apex of distal root of # 37
case 2	N/A	2	2024-02-07	5	2024-05-05	6	6	2024-07-02	2024-05-08		apex of mesial root of # 36			2024-06-09	2024-08-03	2024-09-03		N/A	2024-02-08	2024-02-06	2024-03-05	2024-02-08		5.9 mm apex of mesial root of # 36
case 3	2024-01-06	2024-02-05	2024-02-08	3	2024-04-06	2024-05-05	2024-05-04	2024-04-08	2024-04-07		apex of mesial root of # 37			2024-07-04	2024-07-07	2024-07-09		2024-02-01	2024-02-03	2024-02-07	3	2024-02-08		3.6 mm apex of distal root of # 38
case 4	N/A	2024-01-03	2	2024-02-08	3	2024-04-05	2024-04-06	2024-04-09	2024-04-01		apex of distal root of # 36			2024-08-06	2024-07-02	2024-08-09		N/A	2024-04-01	2024-03-04	2024-03-02	2024-02-05		5.8 mm apex of mesial root of # 37
case 5	N/A	2024-01-07	2024-02-04	2024-02-07	2024-03-08	2024-05-04	2024-05-08	2024-06-01	2024-05-03		apex of mesial root of # 36			2024-05-07	2024-08-02	2024-12-07		N/A	2024-03-03	2024-02-06	2024-03-03	2024-03-04		6.7 mm apex of mesial root of # 37
case 6	N/A	2024-02-03	2024-02-07	2024-02-07	2024-04-01	2024-04-06	2024-05-02	2024-05-06	2024-05-02		apex of distal root of # 36			2024-08-08	2024-06-09	2024-10-04		N/A	2024-03-04	2024-03-04	2024-02-09	2024-02-06		5.6 mm apex of distal root of # 37
case 7	N/A	N/A	2024-02-04	2024-02-08	2024-03-02	4	2024-04-01	2024-04-04	2024-04-08		apex of mesial root of # 37			2024-08-07	4	2024-09-08		N/A	2024-03-06	2024-02-06	2024-02-02	2024-03-01		5.2 mm apex of mesial root of # 37
case 8	N/A	2024-03-04	2024-04-04	2024-04-08	2024-05-04	2024-05-04	2024-05-05	2024-05-08	2024-05-04		middle of tooth # 36			2024-11-03	2024-06-05	2024-10-03		N/A	2024-04-03	2024-02-06	2024-03-03	2024-03-09		4 mm apex of mesial root of # 37
case 9	N/A	N/A	2024-02-04	2024-04-02	2024-05-02	2024-06-02	2024-06-05	2024-05-09	2024-05-01		apex of distal root of # 36			2024-03-02	- 2.5	2024-11-08		N/A	2024-03-08	2024-01-08	2024-02-04	2024-03-04		4.6 mm apex of distal root of # 36
case 10	2024-03-03	6	2024-06-03	2024-07-01	2024-08-03	2024-09-02	2024-09-04	2024-08-08	2024-06-06		apex of distal root of # 36			2024-05-03	2024-08-05	2024-11-05		2024-03-01	2024-03-09	2024-04-07	2024-04-05	2024-03-05		4.8 mm apex of distal root of # 36
case 11	N/A	2025-01-01	2025-01-01	2025-01-05	2025-02-05	2025-02-05	2025-02-05	2025-02-05	2025-02-01		apex of distal root of # 36			2025-04-01	2025-03-01	2025-05-01		N/A	2025-02-03	2025-02-04	2025-03-02	2025-01-01		2025-02-01	mm apex of distal root of # 36
case 12	N/A	2025-03-02	2025-04-02	2025-04-02	5.0	7.0	7.0	7.0	2025-07-02		apex of mesial root of # 36			2025-09-02	2025-07-02	2025-12-02		N/A	3	2025-04-02	2025-04-03	2025-03-02		2025-07-02	mm apex of distal root of # 37
case 13	N/A	2025-02-07	2025-02-07	2025-02-07	2025-03-08	2025-05-08	2025-05-08	2025-05-08	2025-05-07		apex of distal root of # 36			2025-07-07	2025-05-07	2025-09-07		N/A	2025-02-07	2025-02-07	2025-02-07	2025-02-07		2025-05-07	mm apex of distal root of # 37
case 14	2025-02-03	2025-04-01	2025-03-08	2025-03-08	2025-06-01	2025-08-01	2025-08-01	2025-08-01	2025-06-08		apex of mesial root of # 37			2025-10-08	2025-08-08	13.8		N/A	2025-03-08	2025-03-08	2025-03-08	2025-04-01		2025-06-08	mm apex of distal root of # 37
case 15	N/A	2025-02-05	5.0	5.0	2025-03-04	2025-03-04	2025-03-04	2025-03-04	2025-03-09		apex of distal root of # 36			2025-05-09	2025-04-09	2025-08-09		2025-03-05	2025-04-02	5.0	5.0	2025-02-05		2025-03-09	mm apex of distal root of # 37
case 16	N/A	2025-03-09	2025-02-09	2025-02-09	2025-04-09	2025-05-09	2025-05-09	2025-05-09	2025-05-05		apex of mesial root of # 36			2025-08-05	2025-06-05	2025-10-05		N/A	2025-02-09	2025-02-09	2025-02-09	2025-03-09		2025-05-05	mm apex of distal root of # 36
case 17	N/A	N/A	2025-04-01	2025-04-01	2025-06-02	2025-07-02	2025-07-02	2025-07-02	2025-07-01		apex of distal root of # 36			2025-10-01	2025-08-01	2025-12-01		2025-03-02	2025-03-09	2025-04-01	4	2025-01-08		2025-07-01	mm apex of distal root of # 37
case 18	2025-02-06	2025-03-06	2025-03-03	2025-03-03	2025-03-01	2025-04-01	2025-04-01	2025-04-01	2025-04-03		apex of mesial root of # 37			2025-06-03	2025-04-03	2025-08-03		N/A	2025-03-03	2025-03-02	2025-03-03	2025-03-06		2025-04-03	mm apex of distal root of # 38
case19	N/A	N/A	2025-02-05	2025-02-05	2025-05-09	2025-06-09	2025-06-09	2025-06-09	2025-06-09		middle of tooth # 36			2025-09-09	2025-07-09	2025-11-09		N/A	2025-02-05	2025-02-06	2025-02-05	4.0		2025-06-09	mm apex of distal root of # 37
case 20	N/A	2025-02-02	2025-03-09	2025-03-09	2025-02-08	2025-03-08	2025-03-08	2025-03-08	2025-03-08		apex of distal root of # 36			2025-05-08	2025-03-08	2025-07-08		N/A	2025-03-09	2025-03-09	4	2025-02-02		2025-03-08	mm apex of distal root of # 37
case 21	N/A	2025-03-05	2025-04-06	2025-04-06	2025-06-01	2025-07-01	2025-07-01	2025-07-01	2025-07-06		apex of distal root of # 36			2025-10-06	2025-08-06	2025-11-06		N/A	2025-04-06	2025-04-05	2025-04-06	2025-03-05		2025-07-06	mm apex of distal root of # 36
case 22	N/A	N/A	2025-01-08	2025-01-08	4.0	4.0	4.0	4.0	2025-02-08		apex of distal root of # 36			2025-05-09	2025-03-09	2025-09-09		N/A	2025-02-05	2025-02-03	2025-02-06	2025-01-07		2025-02-08	mm apex of distal root of # 37
case 23	N/A	2025-03-01	2025-03-06	2025-03-06	2025-05-05	2025-06-05	2025-06-05	2025-06-05	2025-06-06		apex of mesial root of # 36			2025-09-06	2025-07-06	13.6		N/A	2025-03-06	2025-03-06	2025-03-06	2025-03-01		2025-06-06	mm apex of distal root of # 37
case 24	N/A	2025-02-09	4.0	4.0	2025-02-07	2025-03-07	2025-03-07	2025-03-07	7.0		apex of distal root of # 36			8.0	6.0	2025-08-02		2025-02-05	2025-03-05	4.0	4.0	2025-02-09		7.0	mm apex of distal root of # 37
case 25	N/A	2025-04-05	2025-02-02	2025-02-02	2025-06-05	2025-07-05	2025-07-05	2025-07-05	2025-04-02		apex of distal root of # 36			2025-06-02	2025-04-02	2025-12-05		N/A	2025-02-02	2025-02-02	2025-02-02	2025-04-05		2025-04-02	mm apex of distal root of # 36
case 26	N/A	N/A	2025-04-05	2025-04-05	2025-04-06	2025-04-06	2025-04-06	2025-04-06	2025-08-05		apex of mesial root of # 36			2025-11-05	2025-09-05	2025-07-07		2025-02-08	2025-03-05	2025-04-05	2025-04-05	2.0		2025-08-05	mm apex of distal root of # 37
case 27	2025-03-01	2025-03-03	2025-03-01	2025-03-01	2025-05-08	2025-06-08	2025-06-08	2025-06-08	2025-03-01		apex of distal root of # 36			2025-05-01	2025-03-01	13.5		N/A	2025-03-01	2025-03-01	2025-03-01	2025-03-03		2025-03-01	mm apex of distal root of # 37
case 28	N/A	2025-02-04	2025-05-02	2025-05-02	2025-03-09	2025-03-09	2025-03-09	2025-03-09	2025-07-02		apex of mesial root of # 37			2025-09-02	2025-07-02	2025-10-06		2	2025-03-05	2025-04-08	2025-05-02	2025-02-04		2025-07-02	mm apex of distal root of # 37
case 29	N/A	2025-03-07	2025-02-04	2025-02-04	2025-05-03	2025-07-03	2025-07-03	2025-07-03	2025-05-05		middle of tooth # 36			2025-07-05	2025-05-05	14.8		N/A	2025-02-04	2025-02-04	2025-02-04	2025-03-07		2025-05-05	mm apex of distal root of # 37
case 30	N/A	2025-01-05	2025-04-07	2025-04-07	2025-02-04	2025-04-04	2025-04-04	2025-04-04	2025-04-06		apex of distal root of # 36			2025-06-06	2025-04-06	2025-08-09		N/A	2025-04-07	2025-04-07	2025-04-07	2025-01-05		2025-04-06	mm apex of distal root of # 36
case 31	N/A	2025-04-02	2025-03-05	2025-03-05	6.0	2025-06-07	2025-06-07	2025-06-07	2025-08-03		apex of distal root of # 36			2025-10-03	2025-08-03	2025-11-03		N/A	2025-03-05	2025-03-08	2025-03-05	2025-04-02		2025-08-03	mm apex of distal root of # 36
case 32	2025-02-04	2025-02-08	2025-02-06	2025-02-06	2025-04-04	2025-03-06	2025-03-06	2025-03-06	5.0		apex of distal root of # 36			7.0	5.0	2025-07-04		N/A	2025-02-06	2025-02-07	2025-02-09	2025-02-08		5.0	mm apex of distal root of # 37
case 33	N/A	2025-03-04	2025-04-03	2025-04-03	2025-05-02	2025-07-04	2025-07-04	2025-07-04	2025-06-09		apex of mesial root of # 36			2025-08-09	2025-06-09	13.0		2025-01-05	2025-03-02	2025-04-01	2025-04-02	2025-03-04		2025-06-09	mm apex of distal root of # 36
case 34	N/A	2025-01-09	3.0	3.0	2025-03-06	2025-04-02	2025-04-02	2025-04-02	2025-03-07		apex of distal root of # 36			2025-05-07	2025-03-07	2025-09-04		N/A	3.0	2025-03-02	3.0	2025-01-09		2025-03-07	mm apex of distal root of # 36
case 35	N/A	2025-04-03	2025-04-09	2025-04-09	2025-05-01	2025-06-06	2025-06-06	2025-06-06	2025-05-08		apex of mesial root of # 37			2025-07-08	2025-05-08	2025-12-02		N/A	3	2025-04-05	2025-04-06	2025-04-03		2025-05-08	mm apex of distal root of # 37
case 36	N/A	2025-02-06	2.0	2.0	2025-02-09	2025-03-05	2025-03-05	2025-03-05	2025-04-09		apex of distal root of # 36			2025-06-09	2025-04-09	2025-08-06		N/A	2.0	2025-02-03	2025-02-05	2025-02-06		2025-04-09	mm apex of distal root of # 37
case 37	N/A	N/A	2025-04-04	2025-04-04	2025-06-06	2025-07-05	2025-07-05	2025-07-05	2025-07-04		apex of mesial root of # 36			2025-09-04	2025-07-04	2025-11-01		2025-02-08	3	2025-04-02	2025-04-03	3.0		2025-07-04	mm apex of distal root of # 37
case 38	N/A	2025-04-04	2025-03-02	2025-03-02	2025-04-02	2025-04-03	2025-04-03	2025-04-03	2025-02-09		apex of distal root of # 36			2025-04-09	2025-02-09	2025-07-09		N/A	2025-03-02	2025-03-02	2025-03-02	2025-04-04		2025-02-09	mm apex of distal root of # 37
case 39	N/A	2025-02-03	2025-05-01	2025-05-01	2025-05-04	2025-06-09	2025-06-09	2025-06-09	8.0		apex of mesial root of # 37			10.0	8.0	13.6		3	2025-03-05	4	2025-05-01	2025-02-03		8.0	mm apex of distal root of # 37
case 40	N/A	2025-03-08	2025-02-08	2025-02-08	2025-03-07	2025-03-08	2025-03-08	2025-03-08	2025-04-04		middle of tooth # 36			2025-06-04	2025-04-04	2025-09-02		N/A	2025-02-08	2025-02-08	2025-02-08	2025-03-08		2025-04-04	mm apex of distal root of # 36
case 41	N/A	N/A	2025-03-07	2025-03-07	2025-05-02	2025-07-02	2025-07-02	2025-07-02	2025-06-07		apex of distal root of # 36			2025-08-07	2025-06-07	2025-12-04		N/A	2025-03-07	2025-03-07	2025-03-07	2025-01-06		2025-06-07	mm apex of distal root of # 36
case 42	N/A	2025-03-05	2025-04-08	2025-04-08	2025-02-06	2025-04-07	2025-04-07	2025-04-07	2025-05-02		apex of distal root of # 36			2025-07-02	2025-05-02	2025-08-07		2	3	4	2025-04-08	2025-03-05		2025-05-02	mm apex of distal root of # 36
case 43	N/A	2025-02-01	2025-02-03	2025-02-03	2025-06-03	2025-06-01	2025-06-01	2025-06-01	2025-07-01		apex of mesial root of # 36			2025-09-01	2025-07-01	2025-11-02		N/A	2025-02-03	2025-02-03	2025-02-03	2025-02-01		2025-07-01	mm apex of distal root of # 37
case 44	N/A	4.0	4.0	4.0	2025-04-05	2025-03-02	2025-03-02	2025-03-02	2025-03-06		apex of distal root of # 36			2025-05-06	2025-03-06	2025-07-06		N/A	4.0	4.0	4.0	4.0		2025-03-06	mm apex of distal root of # 36
case 45	N/A	2025-02-05	2025-03-04	2025-03-04	5.0	2025-07-06	2025-07-06	2025-07-06	2025-08-09		apex of mesial root of # 37			2025-10-09	2025-08-09	13.3		N/A	2025-03-04	2025-03-04	2025-03-04	2025-02-05		2025-08-09	mm apex of distal root of # 37
case 46	N/A	2025-03-09	2025-02-01	2025-02-01	2025-03-03	2025-04-09	2025-04-09	2025-04-09	2025-04-01		middle of tooth # 36			2025-06-01	2025-04-01	2025-09-05		N/A	2025-02-01	2025-02-01	2025-02-01	2025-03-09		2025-04-01	mm apex of distal root of # 38
case 47	2025-01-08	2025-01-08	2025-04-02	2025-04-02	2025-05-04	2025-06-04	2025-06-04	2025-06-04	2025-06-05		apex of distal root of # 36			2025-08-05	2025-06-05	12.0		N/A	2025-04-02	2025-04-02	2025-04-02	2025-01-08		2025-06-05	mm apex of distal root of # 37
case 48	N/A	2025-03-06	2025-03-03	2025-03-03	2025-02-02	2025-03-03	2025-03-03	2025-03-03	2025-05-06		apex of distal root of # 36			2025-07-06	2025-05-06	2025-08-03		N/A	2025-03-03	2025-03-03	2025-03-03	2025-03-06		2025-05-06	mm apex of distal root of # 37
case 49	N/A	2025-04-01	2025-04-09	2025-04-09	2025-06-09	2025-07-01	2025-07-01	2025-07-01	2025-07-03		apex of distal root of # 36			2025-09-03	2025-07-03	2025-12-04		N/A	3	2025-04-05	2025-04-09	2025-04-01		2025-07-03	mm apex of distal root of # 36
case 50	N/A	2025-02-02	2025-02-05	2025-02-05	2025-04-08	2025-04-05	2025-04-05	2025-04-05	2025-02-05		apex of mesial root of # 36			2025-05-05	2025-02-05	2025-07-02		N/A	2025-02-05	2025-02-05	2025-02-06	2025-02-02		2025-02-05	mm apex of distal root of # 36
case 51	2025-03-01	2025-03-01	2025-03-08	2025-03-08	2025-05-07	2025-06-03	2025-06-03	2025-06-03	2025-08-02		apex of distal root of # 36			2025-10-02	2025-08-02	14.9		N/A	2025-03-08	2025-03-07	2025-03-08	2025-03-01		2025-08-02	mm apex of distal root of # 36
case 52	N/A	N/A	2025-04-05	2025-04-05	2025-03-05	3.0	3.0	3.0	4.0		apex of mesial root of # 37			6.0	4.0	2025-09-08		2	3	2025-04-05	2025-04-04	2025-02-07		4.0	mm apex of distal root of # 37
case 53	N/A	N/A	2025-02-09	2025-02-09	2025-05-06	2025-07-07	2025-07-07	2025-07-07	2025-06-01		apex of distal root of # 36			2025-08-01	2025-06-01	13.7		N/A	2025-02-09	3	2025-02-09	2025-04-05		2025-06-01	mm apex of distal root of # 37
case 54	N/A	2025-01-09	2025-03-01	2025-03-01	2025-02-03	2025-04-08	2025-04-08	2025-04-08	2025-03-02		apex of mesial root of # 36			2025-05-02	2025-03-02	2025-08-05		N/A	2025-03-01	2025-03-01	2025-03-02	2025-01-09		2025-03-02	mm apex of distal root of # 38
case 55	N/A	2025-03-03	5.0	5.0	2025-06-02	6.0	6.0	6.0	2025-07-05		apex of distal root of # 36			2025-10-05	2025-07-05	2025-11-06		N/A	5.0	2025-04-09	5.0	2025-03-03		2025-07-05	mm apex of distal root of # 36
case 56	N/A	2025-02-04	2025-02-07	2025-02-07	2025-04-07	2025-03-09	2025-03-09	2025-03-09	2025-05-09		apex of mesial root of # 37			2025-07-09	2025-05-09	2025-07-03		N/A	2025-02-07	2025-02-09	2025-02-07	2025-02-04		2025-05-09	mm apex of distal root of # 37
case 57	N/A	2025-03-07	2025-04-01	2025-04-01	2025-05-06	2025-07-04	2025-07-04	2025-07-04	2025-08-01		middle of tooth # 36			2025-10-01	2025-08-01	13.2		N/A	3	3	2025-04-03	2025-03-07		2025-08-01	mm apex of distal root of # 37
case 58	N/A	2025-01-05	2025-03-06	2025-03-06	3.0	2025-04-01	2025-04-01	2025-04-01	2025-03-03		apex of distal root of # 36			2025-05-03	2025-03-03	2025-09-07		N/A	2025-03-06	2025-03-05	2025-03-06	2025-01-05		2025-03-03	mm apex of distal root of # 37
case 59	N/A	N/A	2025-02-02	2025-02-02	2025-05-08	2025-06-05	2025-06-05	2025-06-05	2025-06-04		apex of distal root of # 36			2025-09-04	2025-06-04	2025-12-06		N/A	2025-02-02	2025-02-03	2025-02-02	2025-04-02		2025-06-04	mm apex of distal root of # 36
case 60	N/A	2025-02-08	2025-04-04	2025-04-04	2025-02-01	2025-03-06	2025-03-06	2025-03-06	2025-05-01		apex of distal root of # 36			2025-07-01	2025-05-01	8.0		N/A	2025-04-04	2025-04-06	2025-04-05	2025-02-08		2025-05-01	mm apex of distal root of # 37
case 61	3	2025-03-04	3.0	3.0	2025-06-05	2025-07-03	2025-07-03	2025-07-03	7.0		apex of mesial root of # 36			10.0	7.0	2025-11-08		N/A	3.0	2025-03-02	3.32	2025-03-04		7.0	mm apex of distal root of # 37
case 62	N/A	N/A	2025-03-07	2025-03-07	2025-04-01	4.0	4.0	4.0	2025-04-05		apex of distal root of # 36			2025-06-05	2025-04-05	2025-07-05		N/A	2025-03-07	2025-03-07	2025-03-07	2025-01-06		2025-04-05	mm apex of distal root of # 37
case 63	2	2025-02-09	3.76	6.44	5.84	7.82	2025-05-07	7.71	4.75		apex of distal root of # 36			4.36	7.53	2025-11-05		N/A	2025-02-23	3.64	2.79	2025-02-09		4.78	mm apex of distal root of # 37

## Sheet: male left
	buccal cortex thickness										buccal shifting location			mental foramen position				canal diameters related to each tooth						nearest point to lower border
	# 4	# 4/5	# 5	# 5/6	# 6	# 6/7	# 7	# 7/8	# 8					# 4 apex	# 5 apex	lower border		#4	# 5	# 6	# 7	# 8
case 1	N/A	2024-01-08	2024-02-01	3	2024-03-02	2024-04-02	2024-04-05	2024-05-02	2024-04-05		apex of mesial root # 37			2024-10-08	2024-07-01	10		N/A	2024-04-02	2024-03-04	2024-03-04	4		3.9 mm middle #36
case 2	N/A	2	2024-02-07	2024-03-02	2024-03-02	2024-03-04	2024-04-08	2024-05-02	2024-05-02		apex of mesial root # 37			2024-07-03	2024-02-08	2024-10-02		N/A	2024-01-07	3	2024-03-02	2024-03-05		6.3 mm apex of distal root of #37
case 3	2024-01-03	2024-01-06	2024-01-09	2024-02-08	2024-03-02	2024-03-05	2024-03-08	2024-03-06	4		apex of mesial root # 37			12	2024-09-07	2024-08-05		2024-02-01	2024-02-08	2024-02-05	2024-02-05	2024-02-04		2.6 mm apex of mesial root # 36
case 4	N/A	3	2024-04-01	2024-05-04	2024-05-07	2024-06-02	2024-04-07	2024-05-03	2024-04-02		apex of mesial root # 37			2024-05-09	2024-05-04	2024-09-05		N/A	2024-04-09	2024-02-08	2024-03-04	2024-03-05		3.6 mm apex of mesial root # 37
case 5	2024-02-03	2024-03-02	2024-04-02	2024-05-04	2024-05-06	2024-07-04	2024-08-02	2024-07-09	2024-08-09		apex of mesial root # 37			2024-04-06	2024-06-09	14.7		2024-04-04	2024-04-05	2024-03-05	2024-04-07	2024-04-07		6.9 mm apex of mesial root # 37
case 6	N/A	2024-02-03	3	3	2024-03-01	2024-03-08	2024-04-09	2024-06-02	2024-06-02		apex of distal root # 36			2024-06-05	2025-08-03	13		N/A	2024-02-09	2024-03-01	2024-03-02	2024-03-01		4.3 mm apex of mesial root # 37
case 7	N/A	N/A	2024-02-07	2024-02-09	2024-03-03	4	2024-05-03	2024-05-08	2024-05-07		apex of mesial root # 37			7	2024-04-08	2024-12-04		N/A	2024-02-06	2024-02-03	2024-03-01	2024-03-09		5 mm apex of mesial root # 37
case 8	N/A	2024-01-04	2024-01-06	2024-02-04	3	2024-04-05	2024-05-01	2024-04-04	2024-04-05		apex of mesial root # 37			2025-08-02	5	2024-12-02		N/A	2024-04-05	2024-04-01	5	2024-03-09		4.8 mm apex of mesial root # 37
case 9	N/A	N/A	2.1 loop and open at # 5	2024-02-02	2024-03-05	4	2024-04-05	2024-03-04	2024-03-02		apex of distal root # 37			2024-10-07	2024-04-03	2024-12-08		N/A	2024-04-08	4	2024-04-05	2024-04-09		2.8 mm apex of distal root of #37
case 10	N/A	2024-01-07	2024-02-02	2024-03-03	2024-04-05	2024-05-05	2024-05-05	2024-04-07	2024-03-06		apex of mesial root # 37			2024-07-02	2025-07-07	2024-12-03		N/A	2024-02-06	2024-03-03	2024-03-01	2024-04-01		4.4 mm apex of mesial root # 36
case 11	2024-03-02	2024-03-03	2024-03-04	2024-04-05	2024-05-03	2024-06-01	2024-05-03	2024-04-08	2024-04-03		apex of mesial root # 37			2024-05-04	2025-07-09	11		0.8	2024-01-09	2024-03-01	2024-03-02	2025-02-03		5.6 mm apex of mesial root # 36
case 12	N/A	2025-02-01	2025-02-02	3	2025-03-18	3.33	2025-04-05	5.0	2025-05-01		apex of mesial root # 36			2024-10-08	9	10		N/A	2025-04-01	2024-03-04	2025-03-06	4		3.9 mm middle #36
case 13	N/A	2025-01-07	3	2025-03-05	2025-03-19	3.36	5.0	2025-03-04	2025-02-03		apex of mesial root # 37			2024-07-03	4	2025-11-05		N/A	2025-01-08	3	2024-03-02	2024-03-05		6.3 mm apex of distal root of #37
case 14	2025-01-07	2024-01-06	2025-01-05	4	2025-03-02	2025-03-02	2025-04-08	2025-05-01	2025-04-05		apex of mesial root # 37			12	2024-09-07	10		2025-03-01	2024-02-08	2024-02-05	3.56	5		2.6 mm apex of mesial root # 36
case 15	N/A	2025-02-08	2024-04-01	3	2025-03-11	3.39	2025-05-02	2025-04-07	2025-06-03		apex of mesial root # 37			2024-05-09	2024-05-04	2024-09-05		N/A	2024-04-09	2024-02-08	2024-03-04	2024-03-05		2.6 mm apex of mesial root # 37
case 16	2025-01-03	3	2025-03-09	2025-05-08	2025-03-08	2025-03-29	2025-03-08	2025-05-02	2025-04-08		apex of mesial root # 37			2024-04-06	2024-06-09	15		2025-03-04	2025-03-09	2024-03-05	5	2025-05-03		6.9 mm apex of mesial root # 37
case 17	2025-01-04	2024-02-03	3	3	2025-03-09	2025-03-17	2025-05-01	2025-04-08	2025-04-03		apex of distal root # 37			2024-06-05	2024-10-01	13		N/A	2024-02-09	2024-03-01	2024-03-02	2024-03-01		4.3 mm apex of mesial root # 36
case 18	N/A	2025-01-05	3	2024-02-09	2025-03-28	3.34	2025-04-07	5.0	5.0		apex of mesial root # 37			7	6	11		N/A	2025-03-01	2024-02-03	2024-03-01	2025-03-06		5 mm apex of mesial root # 37
case19	N/A	N/A	2024-01-06	2	2025-03-25	3.38	5.0	2025-04-05	2025-04-09		apex of mesial root # 37			10	2024-04-08	10		N/A	2024-04-05	2024-04-01	5	2024-03-09		5.8 mm apex of mesial root # 37
case 20	N/A	N/A	2025-02-05	2024-02-02	2025-03-31	6	2025-08-02	2025-05-01	2025-05-02		apex of distal root # 37			2024-10-07	2025-03-04	2025-12-03		N/A	2025-04-03	4	2024-04-05	2024-04-09		2.8 mm apex of distal root of #37
case 21	2025-02-05	2025-01-06	2024-02-02	2025-03-05	5.58	2025-06-01	2025-05-02	2025-04-09	2025-04-05		apex of mesial root # 37			2024-07-02	2024-07-04	2024-12-03		N/A	2024-02-06	2024-03-03	2024-03-01	2025-03-05		4.4 mm apex of mesial root # 36
case 22	N/A	2025-03-01	3	2024-04-05	5.74	2025-06-02	2025-04-09	2025-05-02	2025-05-01		apex of mesial root # 37			2024-05-04	2024-09-07	11		2025-01-08	2025-02-04	2024-03-01	2025-03-01	2025-02-06		5.6 mm apex of mesial root # 37
case 23	N/A	2024-01-08	2025-01-09	2025-03-04	5.59	5.96	2025-05-01	2025-08-02	2025-04-08		apex of mesial root # 37			2024-10-08	2024-07-01	12		N/A	2024-04-02	2024-03-04	2025-02-03	4		3.9 mm middle #36
case 24	N/A	2	2025-03-02	2024-03-02	5.68	2025-06-03	2025-05-03	5.0	5.0		apex of mesial root # 36			2025-07-05	2024-02-08	2024-10-02		2	2024-01-07	3	2024-03-02	2024-03-05		6.3 mm apex of distal root of #37
case 25	2024-01-03	2024-01-06	2025-01-03	2024-02-08	5.77	2025-07-17	5.0	2025-04-08	2025-04-09		apex of mesial root # 37			12	2024-09-07	2024-08-05		N/A	2024-02-08	2024-02-05	2024-02-05	2024-02-04		2.6 mm apex of mesial root # 36
case 26	N/A	3	4.1 loop and open at # 5	2025-05-01	5.73	2025-07-22	2025-05-01	2025-05-01	2025-05-02		apex of mesial root # 37			2025-06-01	2024-05-04	2024-09-05		N/A	2024-04-09	2024-02-08	2024-03-04	2024-03-05		2.9 mm apex of mesial root # 37
case 27	2024-02-03	2025-03-05	4	2025-04-09	5.71	2025-07-02	2025-04-05	2025-04-05	2025-04-05		apex of mesial root # 37			2025-04-03	8	13		2025-04-05	2025-04-03	2024-03-05	2024-04-07	2024-04-07		6.9 mm apex of mesial root # 37
case 28	N/A	2024-02-03	3 loop and open at # 5	3	5.75	2025-07-23	2025-05-02	2025-05-03	2025-05-01		apex of distal root # 37			2024-06-05	2025-09-04	13		N/A	2025-03-02	2024-03-01	2024-03-02	2024-03-01		4.3 mm apex of mesial root # 37
case 29	N/A	N/A	2025-02-09	2024-02-09	5.66	2025-07-18	2025-05-05	2025-04-09	2025-04-08		apex of mesial root # 37			2025-07-05	2024-04-08	2025-12-01		N/A	2024-02-06	2024-02-03	2024-03-01	2024-03-09		5 mm apex of mesial root # 37
case 30	N/A	2024-01-04	2025-03-02	2024-02-04	5.67	2025-07-29	2025-05-03	5.0	5.0		apex of mesial root # 37			9	2024-04-08	11		2025-02-08	2024-04-05	2024-04-01	5	2024-03-09		5.5 mm apex of mesial root # 37
case 31	N/A	N/A	2025-02-05	2024-02-02	5.55	2025-07-31	2025-04-05	2025-04-08	2025-04-09		apex of distal root # 37			2024-10-07	2024-04-03	2024-12-08		N/A	5	4	2024-04-05	4		2.8 mm apex of distal root of #37
case 32	N/A	2024-01-07	2024-02-02	2025-03-06	5.52	2025-07-15	2025-04-08	2025-05-01	2025-03-04		apex of mesial root # 37			2025-06-05	2024-07-04	2025-12-04		N/A	2025-02-04	2024-03-03	2024-03-01	2024-04-01		4.4 mm apex of mesial root # 36
case 33	2024-03-02	2024-03-03	2025-02-07	2025-04-02	5.57	2025-03-07	5.0	2025-05-02	2025-04-05		apex of mesial root # 37			2024-05-04	2024-09-07	11		N/A	2025-03-01	2024-03-01	2024-03-02	2		5.6 mm apex of mesial root # 36
case 34	N/A	2025-02-01	2025-01-09	3	2025-03-06	3.67	2025-03-08	2025-04-05	2025-05-01		apex of mesial root # 37			12	2024-07-01	10		N/A	2025-03-05	2024-03-04	2024-03-04	4		4.3 mm apex of mesial root # 37
case 35	N/A	2025-01-07	2025-03-02	2025-03-07	2025-03-05	3.62	2025-05-02	2025-04-09	2025-04-08		apex of mesial root # 37			2024-07-03	2024-02-08	2025-09-07		N/A	2	3	2024-03-02	3		5 mm apex of mesial root # 37
case 36	2025-01-07	2025-02-08	2025-01-03	2024-02-08	2025-03-01	3.68	2025-04-07	5.0	5.0		apex of mesial root # 37			2025-10-05	2024-09-07	9		2024-02-01	2025-02-05	2024-02-05	2024-02-05	4		5.8 mm apex of mesial root # 37
case 37	N/A	3	4.1 loop and open at # 5	2025-05-05	2025-03-03	3.56	2025-05-01	2025-04-08	2025-04-09		apex of mesial root # 37			2024-05-09	2024-05-04	11		N/A	4	2024-02-08	2025-02-09	2024-03-05		2.8 mm apex of distal root of #37
case 38	N/A	2025-02-05	2025-03-09	5	2025-03-07	3.75	2025-08-02	2025-05-01	2025-05-02		apex of mesial root # 37			2024-04-06	2024-06-09	14.7		2025-02-04	2024-04-05	2024-03-05	5	2025-05-04		4.4 mm apex of mesial root # 37
case 39	2024-01-03	2025-01-09	3 loop and open at # 5	3	3.33	2025-03-08	5.0	2025-05-05	2025-04-05		apex of distal root # 36			2024-06-05	11	15		N/A	2025-03-08	2024-03-01	2024-03-02	2024-03-01		4.6 mm apex of mesial root # 36
case 40	N/A	2025-02-05	3	3	2025-03-29	4.31	2025-04-09	2025-04-05	2025-05-01		apex of mesial root # 37			7	2025-05-07	9		N/A	2024-02-06	2024-02-03	2025-04-06	3		3.9 mm middle #36
case 41	N/A	N/A	2025-03-02	2024-02-04	3.37	4.32	2025-05-02	2025-04-09	2025-04-08		apex of mesial root # 36			11	2025-03-08	2024-12-02		N/A	2024-04-05	2024-04-01	5	2024-03-09		6.3 mm apex of distal root of #36
case 42	2025-02-06	2025-01-05	2025-02-05	2024-02-02	3.34	4.33	2025-05-03	5.0	5.0		apex of distal root # 37			2025-09-08	2024-04-03	12		2025-01-08	2024-04-08	4	2024-04-05	2025-03-08		2.6 mm apex of mesial root # 36
case 43	N/A	2024-03-03	2024-02-02	2024-03-03	3.32	4.34	2025-05-01	2025-04-08	2025-04-09		apex of mesial root # 37			2024-07-02	2024-07-04	2024-12-03		N/A	2024-02-06	2024-03-03	2024-03-01	2024-04-01		3.6 mm apex of mesial root # 37
case 44	N/A	2024-01-08	2025-02-08	2024-04-05	3.35	4.39	2025-05-01	2025-05-01	2025-05-03		apex of mesial root # 37			2024-05-04	10	11		N/A	2024-01-09	2024-03-01	2025-03-01	2		6.9 mm apex of mesial root # 37
case 45	N/A	N/A	2025-01-09	3	2025-03-01	2025-04-04	2025-04-05	2025-05-02	2025-04-05		apex of mesial root # 37			11	2024-07-01	10		N/A	2024-04-02	2024-03-04	2025-03-05	2025-03-09		4.4 mm apex of mesial root # 36
case 46	N/A	2024-01-06	3	2024-03-02	2.96	2025-04-29	5.0	2025-04-05	2025-05-01		apex of mesial root # 37			2024-07-03	2024-02-08	2024-10-02		N/A	2024-01-07	3	2025-02-09	2024-03-05		5.6 mm apex of mesial root # 36
case 47	2025-02-09	2025-02-08	2025-01-03	2025-03-01	2025-03-02	3.81	2025-05-05	2025-04-09	2025-04-08		apex of mesial root # 37			12	2024-09-07	2024-08-05		2024-02-01	2024-02-08	2024-02-05	2024-02-05	2024-02-04		3.9 mm middle #36
case 48	N/A	3	4.5 loop and open at # 5	2024-05-04	3.57	3.77	2025-05-03	5.0	5.0		apex of mesial root # 37			2024-05-09	2025-05-03	2025-10-05		N/A	2024-04-09	2024-02-08	2025-03-09	2025-03-04		6.3 mm apex of distal root of #37
case 49	N/A	2024-02-03	2025-03-09	2024-05-04	3.48	3.87	2025-04-05	2025-08-02	2025-04-05		apex of mesial root # 37			2024-04-06	7	14		2025-03-04	4	2024-03-05	2025-04-03	2025-04-06		2.6 mm apex of mesial root # 36
case 50	2025-01-07	2025-01-07	3 loop and open at # 5	3	3.45	2025-05-25	2025-04-08	2025-05-01	2025-05-01		apex of distal root # 37			2024-06-05	2025-09-09	13		N/A	2024-02-09	2024-03-01	2024-03-02	2024-03-01		4.3 mm apex of mesial root # 37
case 51	N/A	N/A	3	2024-02-09	3.59	5.34	2025-05-02	2025-04-08	2025-04-08		apex of mesial root # 37			7	2024-04-08	12		N/A	2024-02-06	2024-02-03	2025-03-03	5		5 mm apex of mesial root # 37
case 52	N/A	N/A	2025-03-02	2024-02-04	2025-03-05	5.38	2025-03-08	2025-05-02	5.0		apex of mesial root # 37			2025-09-03	2025-04-05	2024-12-02		N/A	4	2024-04-01	2025-03-05	2024-03-09		5.8 mm apex of mesial root # 37
case 53	2024-01-03	2025-01-07	2025-02-05	2024-02-02	3.43	2025-05-04	2025-05-01	2025-04-05	2025-04-05		apex of distal root # 37			10	2025-04-06	13.1		0.6	2024-04-08	4	2025-04-02	2025-03-09		4.8 mm apex of distal root of #37
case 54	N/A	2025-03-04	2024-02-02	3	4.42	2025-06-04	2025-04-07	2025-04-09	2025-05-01		apex of mesial root # 37			8	8	12		N/A	2024-02-06	2024-03-03	2025-03-05	2024-04-01		4.4 mm apex of mesial root # 37
case 55	2025-02-05	2024-01-08	2025-02-07	2024-04-05	4.43	5.82	5.0	5.0	2025-04-08		apex of mesial root # 37			2024-05-04	2025-09-04	11		N/A	2025-02-09	2024-03-01	2024-03-02	3		5.6 mm apex of mesial root # 36
case 56	N/A	2	2025-02-05	3	4.52	5.97	2025-08-02	2025-05-01	5.0		apex of mesial root # 37			11	2024-07-01	10		N/A	2024-04-02	2024-03-04	3	2025-04-05		3.9 mm middle #36
case 57	N/A	N/A	2024-02-02	2024-03-02	4.55	5.91	2025-05-02	2025-04-08	2025-04-05		apex of mesial root # 36			2025-07-05	3	2024-10-02		N/A	2025-02-07	3	2024-03-02	2024-03-05		4.3 mm apex of distal root of #37
case 58	N/A	2025-02-09	2025-02-07	2025-03-02	4.49	5.93	2025-04-09	2025-05-02	2025-05-01		apex of mesial root # 37			11	2025-09-05	13		N/A	2024-02-08	2024-02-05	2024-02-05	2024-02-04		3.6 mm apex of mesial root # 36
case 59	N/A	3	2025-01-09	5	2025-05-22	5.89	2025-05-01	2025-04-05	2025-04-08		apex of mesial root # 37			2025-05-07	2024-05-04	2025-11-05		N/A	2024-04-09	2024-02-08	2024-03-04	2024-03-05		2.6 mm apex of mesial root # 37
case 60	N/A	2024-02-03	2025-03-02	2024-05-04	2025-05-28	5.94	2025-05-03	2025-04-09	5.0		apex of mesial root # 37			2024-04-06	2025-07-09	14		2024-04-04	2024-04-05	2024-03-05	4	2025-04-05		5.9 mm apex of mesial root # 37
case 61	N/A	2025-01-05	2025-01-03	2025-02-08	5.39	5.98	5.0	5.0	2025-04-05		apex of distal root # 37			2025-06-07	9	13		2025-02-02	2024-02-09	2024-03-01	2024-03-02	2025-02-09		4.3 mm apex of mesial root # 36
case 62	N/A	2025-01-05	4.1 loop and open at # 5	2025-03-01	2025-05-31	5.84	2025-05-01	2025-05-01	2025-05-01		apex of mesial root # 37			8	2024-04-08	6		N/A	2025-03-06	2024-02-03	2025-03-09	2024-03-09		3.9 mm middle #36
case 63	3	N/A	2025-03-09	2024-02-04	2025-03-14	2025-06-05	2025-04-05	2025-05-01	2025-04-03		apex of mesial root # 37			7	2025-05-01	2024-12-02		N/A	2024-04-05	2024-04-01	5	4		6.3 mm apex of distal root of #37
